# Supplementary material for: The Impact of Clinical Reasoning Curriculum on Internal Medicine Residents: A Mixed Methods Approach
Source: Research Square preprint supplement (doi:10.21203/rs.3.rs-7328148/v1), 2025-10-01
Supplement: Supplementary file 1 [file fc64ad3df3c8a1a6ac7320d6.docx]

| **Clinical Reasoning Curriculum- IM** |
| --- |

Survey for Internal Medicine Residents Attending Clinical Reasoning Sessions

Top of Form

**Question Title**

* 1. Residency Year:

PGY-1

PGY-2

PGY-3

PGY-4

**Question Title**

* 2. Age:

Under 25

25-29

30-34

35-39

40+

**Question Title**

* 3. Gender:

Male

Female

Non-binary

Prefer not to say

**Question Title**

* 4. Medical School Location:

United States

International

**Question Title**

* 5. Prior Experience with Clinical Reasoning Courses (Before Residency):

Yes

No

**Question Title**

* 6. Overall Satisfaction with the Clinical Reasoning Sessions:

Very Satisfied

Satisfied

Neutral

Dissatisfied

Very Dissatisfied

**Question Title**

* 7. The Content of the Sessions was Relevant to My Clinical Practice:

Strongly Agree

Agree

Neutral

Disagree

Strongly Disagree

**Question Title**

* 8. The Teaching Methods Used in the Sessions Were Effective:

Strongly Agree

Agree

Neutral

Disagree

Strongly Disagree

**Question Title**

* 9. The Sessions Enhanced My Ability to Approach Complex Clinical Cases:

Strongly Agree

Agree

Neutral

Disagree

Strongly Disagree

**Question Title**

* 10. I Would Recommend These Sessions to Other Residents:

Strongly Agree

Agree

Neutral

Disagree

Strongly Disagree

**Question Title**

* 11. The Sessions Improved My Efficiency in Diagnosing Patients:

Strongly agree

Agree

Neutral

Disagree

Strongly disagree

**Question Title**

* 12. The Sessions Helped Me Recognize and Mitigate Cognitive Biases in My Clinical Practice:

Strongly agree

Agree

Neutral

Disagree

Strongly disagree

**Question Title**

* 13. I Feel More Confident in My Ability to Avoid Diagnostic Errors After Attending These Sessions:

Strongly agree

Agree

Neutral

Disagree

Strongly disagree

**Question Title**

* 14. The Sessions Contributed to a Reduction in My Diagnostic Turnaround Time:

Strongly agree

Agree

Neutral

Disagree

Strongly disagree

**Question Title**

* 15. The Sessions Have Led Me to Change My Approach to Patient Management:

Strongly agree

Agree

Neutral

Disagree

Strongly disagree

**Question Title**

* 16. I Have Applied the Techniques Learned in the Sessions to Real-World Clinical Cases:

Strongly agree

Agree

Neutral

Disagree

Strongly disagree

**Question Title**

* 17. The Sessions Have Positively Impacted My Academic Performance (e.g., In-Training Exams, Board Preparation):

Strongly agree

Agree

Neutral

Disagree

Strongly disagree

**Question Title**

* 18. The Sessions Have Encouraged Me to Pursue Further Education or Research in Clinical Reasoning:

Strongly agree

Agree

Neutral

Disagree

Strongly disagree

**Question Title**

* 19. What aspects of the clinical reasoning sessions did you find most beneficial?

**Question Title**

* 20. What areas of the sessions could be improved?

**Question Title**

* 21. Please share any specific examples of how the sessions have impacted your clinical practice or academic performance.

**Question Title**

* 22. Any additional comments or suggestions?

Bottom of Form
